# Supplementary material for: Solution-processed multifunctional transparent conductive films based on long silver nanowires/polyimide structure with highly thermostable and antibacterial properties
Source: Royal Society of Chemistry journal article supplement (doi:10.1039/c7ra04569g), 2017-01-01
Supplement: c7ra04569g1.pdf [file c7ra04569g1.pdf]

## Supporting Information

### **Solution Processed Multifunctional Transparent Conductive Films Based on Long Silver Nanowires/Polyimide Structure with Highly Thermostable and Antibacterial Properties**

Yan Yu <sup>a</sup>, Wenfeng Shen <sup>a\*</sup>, Fan Li <sup>b</sup>, Xingzhong Fang <sup>a</sup>, Hong Duan <sup>b</sup>, Feng Xu <sup>a</sup>,  
Yonghua Xiong <sup>b</sup>, Wei Xu and Weijie Song <sup>a\*</sup>

<sup>a</sup> Ningbo Institute of Material Technology and Engineering, Chinese Academy of Sciences,  
Ningbo, Zhejiang 315201, China

<sup>b</sup> State Key Laboratory of Food Science and Technology, Nanchang University, Nanchang,  
Jiangxi 330047, China

\*Email: wfshen@nimte.ac.cn (W. Shen); weijiesong@nimte.ac.cn (W. Song).

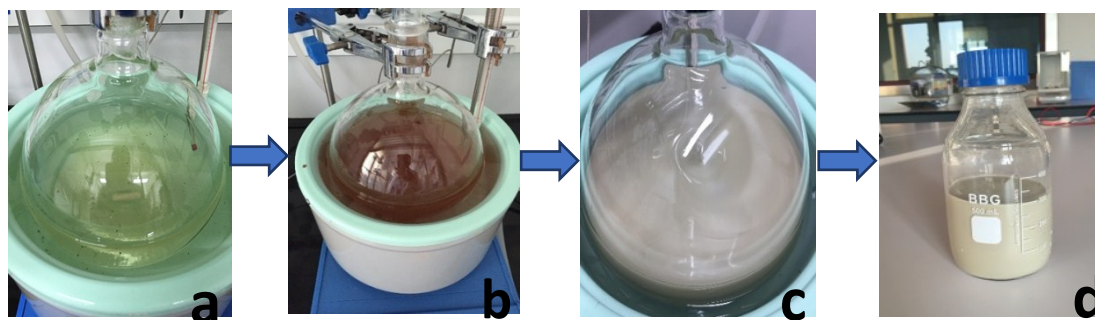

Figure S1. Preparation process of AgNWs. (a) The begin of the reaction (Mixed solutions color: light yellow); (b) During the reaction (Brown); (c) The end of the reaction (gray); (d) AgNWs solutions after centrifuged cleaning.

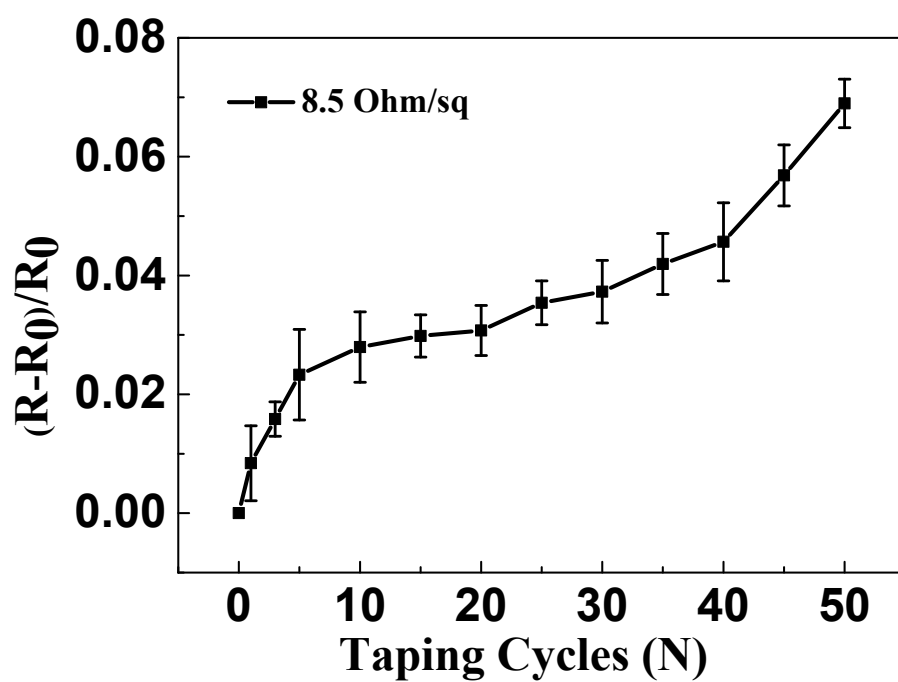

Figure S2. Sheet resistance change of the AgNW/PI TCF with 3M taping test.

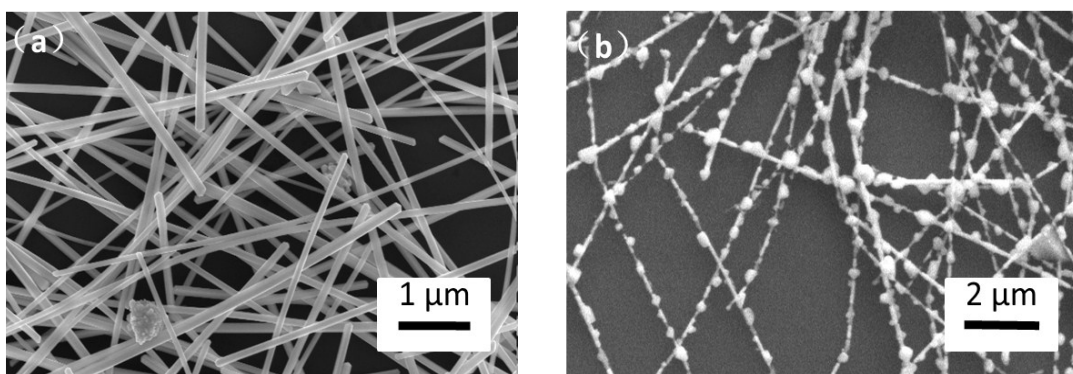

Figure S3. Surface morphologies of pure AgNW film before (a) and after (b) annealed at 250 °C for 1 h.

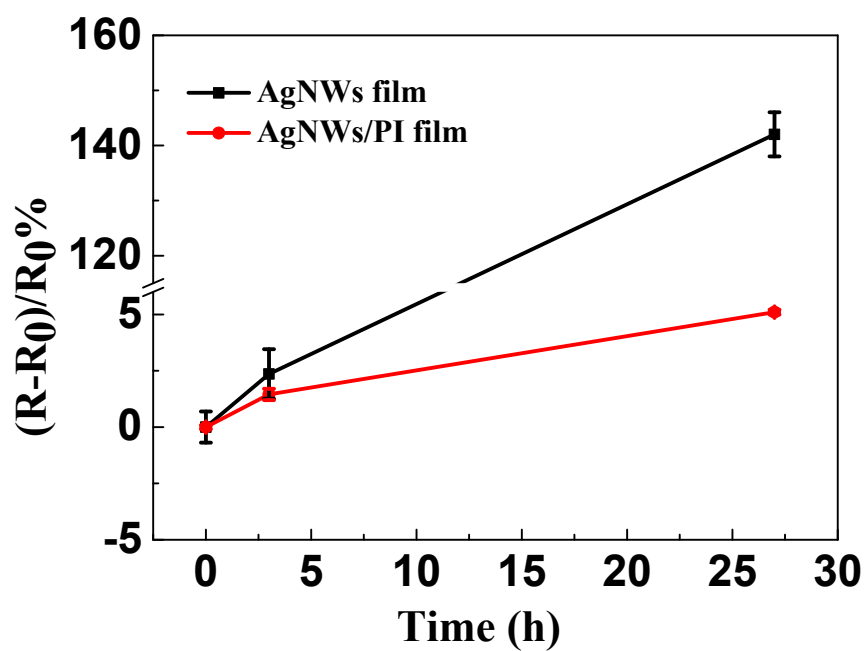

Figure S4. The change of the sheet resistance after the thermal moisture test in a humidity chamber (121 °C, 97% relative humidity).

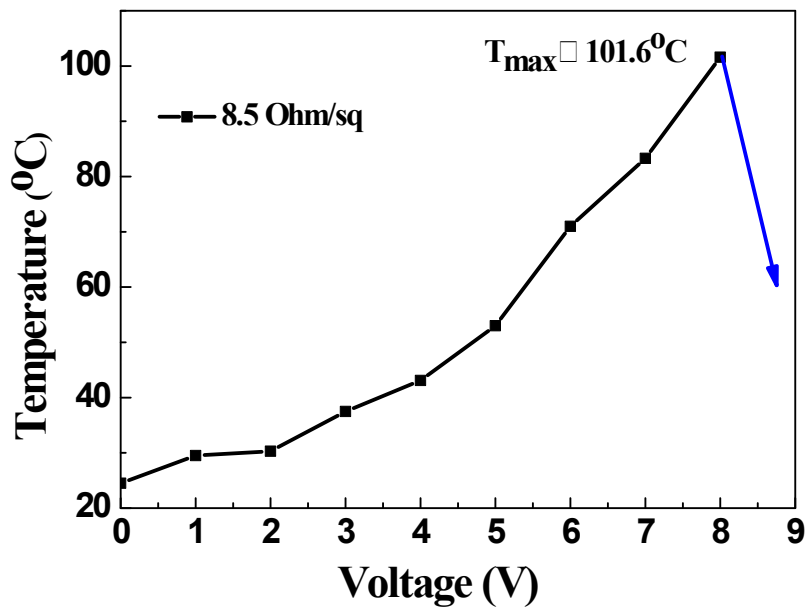

Figure S5. Temperature change of the AgNW/PI TCF ( $R_s = 8.5 \text{ Ohm/sq}$ ) with different input voltages.

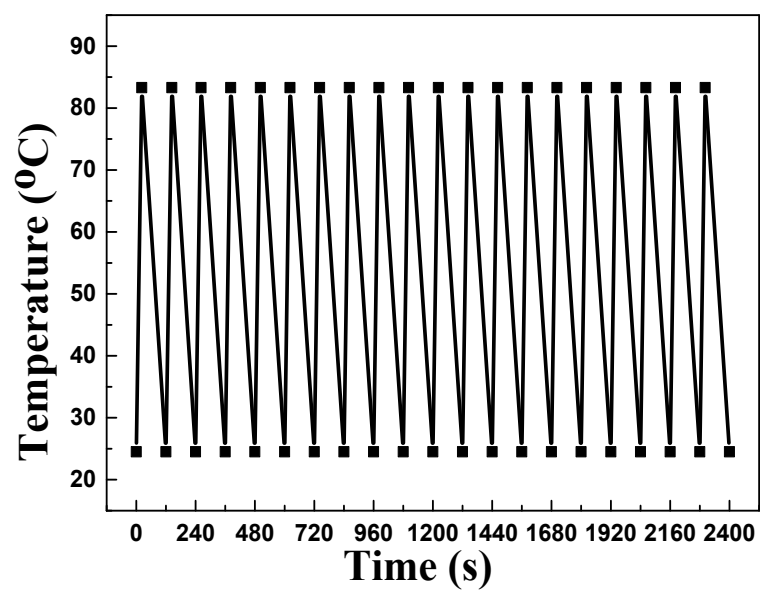

Figure S6. Cycling performance of AgNW/PI TCF with sheet resistance of 8.5 ohm/sq.
